# Supplementary material for: Risk Factors for Therapeutic Intervention of Remdesivir in Mild to Moderate COVID-19—A Single-Center Retrospective Study of the COVID-19 Fourth Pandemic Period in Wakayama, Japan
Source: MDPI journal article supplement (doi:10.3390/medicina58010118), 2022-01-13
Supplement: s1 [file s1]

## Patient Questionnaire (Symptoms related to COVID-19 infection)

Date: \_\_\_\_\_

Name: \_\_\_\_\_

Age: \_\_\_\_\_

Address: \_\_\_\_\_

Date of Admission: \_\_\_\_\_

Please answer the following questions:

|                                           |                              |                             |
|-------------------------------------------|------------------------------|-----------------------------|
| 1) Do you have runny nose?                | <input type="checkbox"/> Yes | <input type="checkbox"/> No |
| 2) Do you have throat pain?               | <input type="checkbox"/> Yes | <input type="checkbox"/> No |
| 3) Do you have cough?                     | <input type="checkbox"/> Yes | <input type="checkbox"/> No |
| 4) Do you have sputum?                    | <input type="checkbox"/> Yes | <input type="checkbox"/> No |
| 5) Do you have general fatigue?           | <input type="checkbox"/> Yes | <input type="checkbox"/> No |
| 6) Do you have headache?                  | <input type="checkbox"/> Yes | <input type="checkbox"/> No |
| 7) Do you have arthralgia?                | <input type="checkbox"/> Yes | <input type="checkbox"/> No |
| 8) Do you have gastrointestinal symptoms? | <input type="checkbox"/> Yes | <input type="checkbox"/> No |
| 9) Do you have loss of smell?             | <input type="checkbox"/> Yes | <input type="checkbox"/> No |
| 10) Do you have loss of taste?            | <input type="checkbox"/> Yes | <input type="checkbox"/> No |
| 11) Do you have shortness of breath?      | <input type="checkbox"/> Yes | <input type="checkbox"/> No |

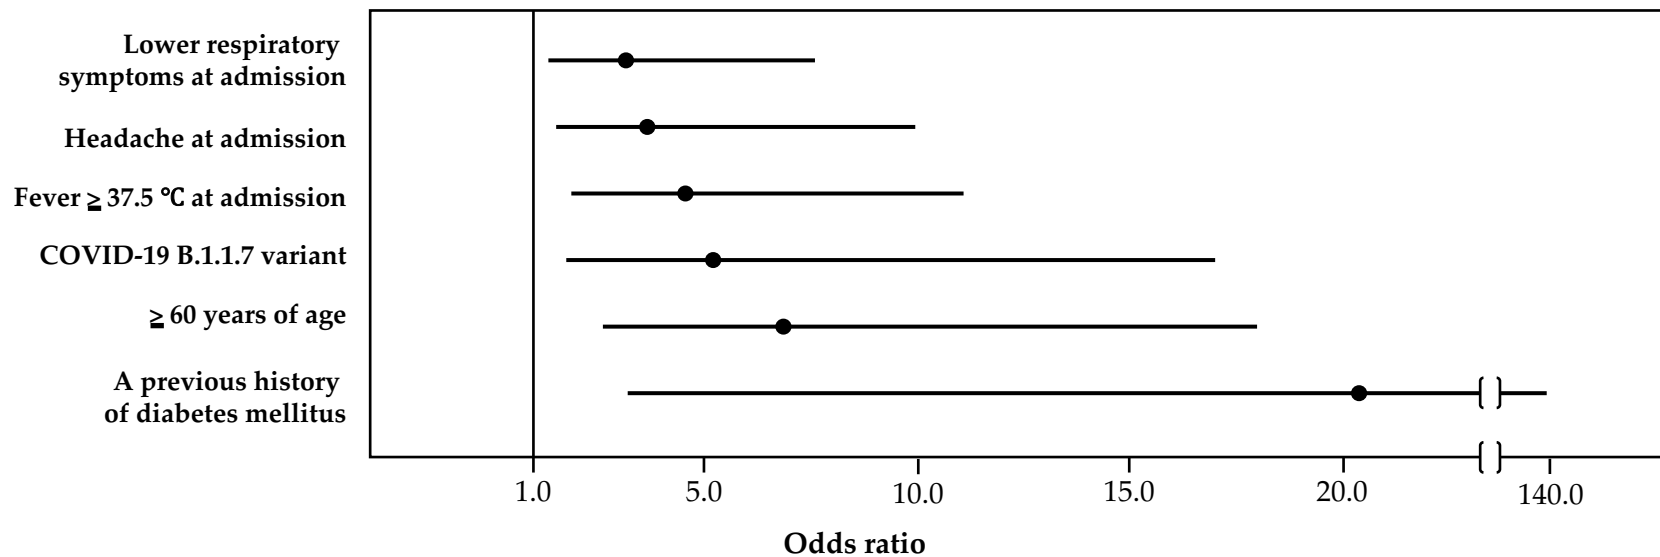

**Supplemental Figure S1.** Adjusted OR of risk factors for therapeutic intervention of remdesivir among mild to moderate COVID-19 hospitalized patients. Circles represent adjusted OR, error bars represent 95% CI.
